# Supplementary material
Source: HighWire-hosted journal article supplement (https://srh.bmj.com/highwire/filestream/143050/field_highwire_adjunct_files/2/bmjsrh-2023-201819supp003_data_supplement.pdf)
Supplement: bmjsrh-2023-201819supp003_data_supplement.pdf [file bmjsrh-2023-201819supp003_data_supplement.pdf]

Supplementary table 3 Distribution of participants' fertility intentions across country region, country income level, and socio-demographic characteristics (n=10672)

|                                         | Fertility intentions |       |           |       |             |       |             |       | P value* |
|-----------------------------------------|----------------------|-------|-----------|-------|-------------|-------|-------------|-------|----------|
|                                         | Total                |       | Postponed |       | Accelerated |       | Not Changed |       |          |
|                                         | n                    | col % | n         | row % | n           | row % | n           | row % |          |
| <b>Age (years)</b>                      |                      |       |           |       |             |       |             |       |          |
| Mean (SD)                               | 29.9                 | 7.8   | 29.6      | 5.8   | 29.9        | 6.2   | 30.0        | 8.1   | >0.05    |
| <b>Marital status</b>                   |                      |       |           |       |             |       |             |       | <0.05    |
| Single <sup>†</sup>                     | 3157                 | 29.6  | 218       | 6.9   | 104         | 3.3   | 2835        | 89.8  |          |
| Not married, have a partner             | 5030                 | 47.2  | 521       | 10.4  | 237         | 4.7   | 4272        | 84.9  |          |
| Legally married                         | 2467                 | 23.2  | 347       | 14.0  | 108         | 4.4   | 2012        | 81.6  |          |
| <b>Education</b>                        |                      |       |           |       |             |       |             |       | <0.001   |
| No formal education-secondary education | 2469                 | 23.9  | 214       | 8.7   | 86          | 3.5   | 2169        | 87.8  |          |
| Some college/university                 | 1662                 | 16.0  | 158       | 9.5   | 53          | 3.2   | 1451        | 87.3  |          |
| Completed college/university            | 6217                 | 60.1  | 677       | 10.9  | 292         | 4.7   | 5248        | 84.4  |          |
| <b>Religion</b>                         |                      |       |           |       |             |       |             |       | <0.001   |
| Has no religious belief                 | 4211                 | 48.0  | 329       | 7.8   | 136         | 3.2   | 3746        | 89.0  |          |
| Has a religious belief                  | 4558                 | 52.0  | 568       | 12.5  | 237         | 5.2   | 3753        | 82.3  |          |
| <b>Number of children</b>               |                      |       |           |       |             |       |             |       | <0.05    |
| 0                                       | 7779                 | 72.9  | 743       | 9.6   | 365         | 4.6   | 6671        | 85.8  |          |
| 1                                       | 1294                 | 12.1  | 233       | 18.0  | 51          | 3.9   | 1010        | 78.1  |          |
| >=2                                     | 1597                 | 15.0  | 112       | 7.0   | 35          | 2.2   | 1450        | 90.8  |          |
| <b>Country region</b>                   |                      |       |           |       |             |       |             |       | <0.05    |
| Sub-Saharan Africa (SSA)                | 284                  | 2.7   | 73        | 25.7  | 22          | 7.7   | 189         | 66.6  |          |
| Latin America and the Caribbean (LAC)   | 3322                 | 31.0  | 402       | 12.1  | 129         | 3.9   | 2791        | 84.0  |          |
| North America (NA)                      | 273                  | 2.6   | 24        | 8.8   | 13          | 4.8   | 236         | 86.4  |          |
| East Asia and the Pacific (EAP)         | 562                  | 5.3   | 49        | 8.7   | 43          | 7.7   | 470         | 83.6  |          |
| Europe and Central Asia (ECA)           | 6231                 | 58.4  | 540       | 8.7   | 244         | 3.9   | 5447        | 87.4  |          |
| <b>Country income level</b>             |                      |       |           |       |             |       |             |       | <0.001   |
| High-income countries                   | 7204                 | 67.5  | 605       | 8.4   | 287         | 4.0   | 6312        | 87.6  |          |
| Upper-middle-income countries           | 3395                 | 31.8  | 464       | 13.7  | 158         | 4.6   | 2773        | 81.7  |          |
| Low or low-middle-income countries      | 73                   | 0.7   | 19        | 26.0  | 6           | 8.2   | 48          | 65.8  |          |

\* Compared using Bonferroni correction.

<sup>†</sup> Single: including, no partner, widowed, divorced, other.
